# Supplementary material for: Epigenetic Regulation of PLIN1 in Obese Women and its Relation to Lipolysis
Source: PubMed Central journal article supplement (PMC5578955; doi:10.1038/s41598-017-09232-y), 2017-08-31
Supplement: 41598_2017_9232_MOESM1_ESM.pdf [file 41598_2017_9232_MOESM1_ESM.pdf]

## Epigenetic regulation of *PLIN1* in obese women and its relation to lipolysis

Lucia Bialesova<sup>1</sup>, Agné Kulyté<sup>2</sup>, Paul Petrus<sup>2</sup>, Indranil Sinha<sup>1</sup>, Jurga Laurencikiene<sup>2</sup>, Chunyan Zhao<sup>1</sup>, Karin Dahlman Wright<sup>1</sup>, Peter Arner<sup>2</sup>, Ingrid Dahlman<sup>2\*</sup>

1. Karolinska Institutet, Department of Biosciences and Nutrition, S-141 83 Stockholm, Sweden

2. Karolinska Institutet, Department of Medicine, Huddinge, S-141 86 Stockholm, Sweden

Fig. S1

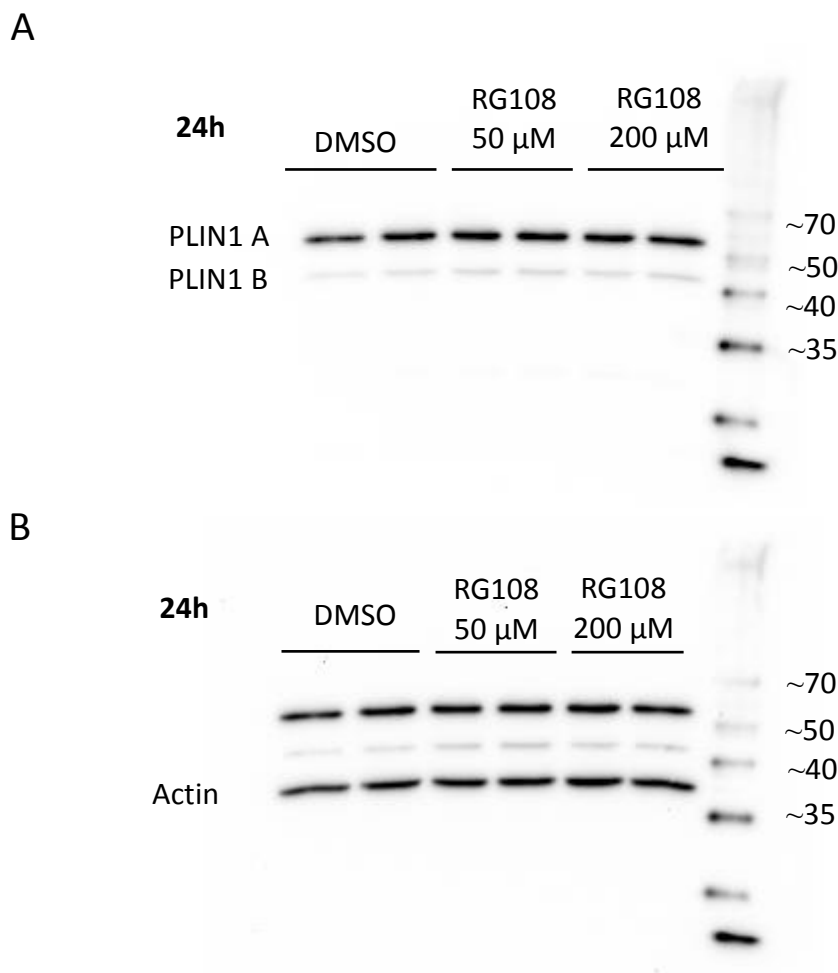

**Fig. S1. Full length blot images** A. Full length blot image of Figure 4B (PLIN1). Extra protein bands represent PLIN1 expression after 24h treatment with 200  $\mu$ M RG108. B. Full length blot image of Figure 4B (Actin). Extra protein bands represent Actin expression after 24h treatment with 200  $\mu$ M RG108.
